# Supplementary material
Source: PubMed Central journal article supplement (PMC5989274)
Supplement: pr8b00065_si_001.pdf [file pr8b00065_si_001.pdf]

Supporting Information for

**Toward Spectral Library-Free Matrix-Assisted Laser Desorption/Ionization Time-of-Flight Mass Spectrometry Bacterial Identification**

Ding Cheng<sup>1</sup>, Liang Qiao<sup>1</sup>, \* and Peter Horvatovich<sup>2</sup>, \*

1. Department of Chemistry, Shanghai Stomatological Hospital, Fudan University, Shanghai 200000, China

2. Department of Pharmacy, University of Groningen, 9700 AD Groningen, The Netherlands

\*: Correspondence should be addressed to Dr. Liang Qiao (liang\_qiao@fudan.edu.cn, Tel: +86 21 31249161) or Prof. Peter Horvatovich (p.l.horvatovich@rug.nl, Tel: +31 50 363 3341)

**Table of Contents**

|                                                                                                                   |    |
|-------------------------------------------------------------------------------------------------------------------|----|
| S1: Proteomic Database .....                                                                                      | 2  |
| S2: Spectra Details.....                                                                                          | 4  |
| S3: Optimization of the number of the most informative genes for bacterial identification (Figure S1) .....       | 19 |
| S4: Example of identification .....                                                                               | 20 |
| S5: Chance of random matches (Figure S2) .....                                                                    | 25 |
| S6: Bacterial identification by considering only ribosomal proteins (Figure S3) .....                             | 26 |
| S7: Variation in molecular weights of the proteins encoded by the most informative genes (Figure S4a and b) ..... | 27 |

## **S1: Proteomic Database**

Fasta File of proteins of 42 genera / 1276 species of microorganisms was downloaded from UniProt (<http://www.uniprot.org/>). After cleaning according to the rules as explained in the methods section, 83452 protein entries were left, and uploaded to the Github (<https://github.com/dipcarbon/BacteriaMSLF>).

The list of 42 genera:

Acinetobacter  
Bacillus  
Bacteroides  
Bordetella  
Brucella  
Buchnera  
Burkholderia  
Campylobacter  
Chlamydia  
Chlorobium  
Clostridium  
Corynebacterium  
Escherichia  
Flavobacterium  
Francisella  
Geobacter  
Haemophilus  
Helicobacter  
Klebsiella  
Lactobacillus  
Lactococcus  
Lecanicillium  
Legionella  
Listeria  
Mycobacterium  
Mycoplasma  
Neisseria  
Pasteurella  
Prochlorococcus  
Pseudomonas  
Rhizobium  
Rhodopseudomonas  
Rickettsia Salmonella  
Shewanella  
Shigella  
Staphylococcus  
Streptococcus  
Streptomyces  
Synechococcus

Vibrio  
Xanthomonas  
Yersinia

## S2: Spectra Details

[C] indicates that the spectrum was selected for training/testing procedure.

### 1. Spectra obtained from Folkhälsomyndigheten

Mass spectra of 296 microorganisms strains were obtained from Spectra by the Public Health Agency of Sweden (Folkhälsomyndigheten):

Gordonia terrae NRRL B-16283T HKU  
Gordonia lacunae NRRL B-24551T HKU  
Gordonia hongkongensis HKU50T HKU  
Gordonia hongkongensis HKU46 HKU  
[C]Yersinia similis CCUG 52882 SMI  
[C]Yersinia rohdei SMI Y81-12 SMI  
[C]Yersinia rohdei SMI 6-09 SMI  
[C]Yersinia rohdei SMI 4-11 SMI  
[C]Yersinia rohdei SMI 4-09 SMI  
[C]Yersinia rohdei SMI 10-12 SMI  
[C]Yersinia pseudotuberculosis SMI 78-08 SMI  
[C]Yersinia pseudotuberculosis SMI 46-09 SMI  
[C]Yersinia pseudotuberculosis SMI 42-08 SMI  
[C]Yersinia pseudotuberculosis SMI 33-12 SMI  
[C]Yersinia pseudotuberculosis SMI 33-08 SMI  
[C]Yersinia pseudotuberculosis SMI 26-10 SMI  
[C]Yersinia pseudotuberculosis SMI 24-12 SMI  
[C]Yersinia pseudotuberculosis SMI 18-09 SMI  
[C]Yersinia pseudotuberculosis SMI 10-10 SMI  
[C]Yersinia pestis NCTC 8775 SMI  
[C]Yersinia pestis NCTC 570 SMI  
[C]Yersinia pestis NCTC 2868 SMI  
[C]Yersinia pestis NCTC 2028-4 SMI  
[C]Yersinia pestis NCTC 144 SMI  
[C]Yersinia pestis NCTC 10330 SMI  
[C]Yersinia pestis NCTC 10329-3 SMI  
[C]Yersinia pestis NCTC 10030 SMI  
[C]Yersinia pestis KIM5 SMI  
[C]Yersinia pekkanenii CCUG 60991 SMI  
[C]Yersinia mollaretii SMI 65-09 SMI  
[C]Yersinia mollaretii SMI 6-10 SMI  
[C]Yersinia mollaretii SMI 30-12 SMI  
[C]Yersinia mollaretii SMI 25-12 SMI  
[C]Yersinia mollaretii CCUG 37901 SMI  
[C]Yersinia massiliensis SMI 37-07 SMI  
[C]Yersinia massiliensis SMI 32-11 SMI  
[C]Yersinia massiliensis SMI 2-08 SMI

[C]Yersinia kristensenii SMI Y35-13 SMI  
[C]Yersinia intermedia ATCC 29909 SMI  
[C]Yersinia frederiksenii SMI Y71-12 SMI  
[C]Yersinia frederiksenii SMI Y34-13 SMI  
[C]Yersinia frederiksenii SMI Y3-12 SMI  
[C]Yersinia frederiksenii SMI Y1-11 SMI  
[C]Yersinia enterocolitica CCUG 8252 SMI  
[C]Yersinia enterocolitica CCUG 8251 SMI  
[C]Yersinia enterocolitica CCUG 8250 SMI  
[C]Yersinia enterocolitica CCUG 8249 SMI  
[C]Yersinia enterocolitica CCUG 8248 SMI  
[C]Yersinia enterocolitica CCUG 8245 SMI  
[C]Yersinia enterocolitica CCUG 8244 SMI  
[C]Yersinia enterocolitica CCUG 8243 SMI  
[C]Yersinia enterocolitica CCUG 8240 SMI  
[C]Yersinia enterocolitica CCUG 8238 SMI  
[C]Yersinia enterocolitica CCUG 8237 SMI  
[C]Yersinia enterocolitica CCUG 8236 SMI  
[C]Yersinia enterocolitica CCUG 8235 SMI  
[C]Yersinia enterocolitica CCUG 8233 SMI  
[C]Yersinia enterocolitica CCUG 8232 SMI  
[C]Yersinia enterocolitica CCUG 8231 SMI  
[C]Yersinia enterocolitica CCUG 4588 SMI  
[C]Yersinia enterocolitica CCUG 37895 SMI  
[C]Yersinia enterocolitica CCUG 33553 SMI  
[C]Yersinia enterocolitica CCUG 31436 SMI  
[C]Yersinia enterocolitica CCUG 29125 SMI  
[C]Yersinia enterocolitica CCUG 12369 SMI  
[C]Yersinia bercovieri SMI Y45-13 SMI  
[C]Yersinia bercovieri SMI Y44-13 SMI  
[C]Yersinia bercovieri SMI Y36-13 SMI  
[C]Yersinia bercovieri SMI Y33-13 SMI  
[C]Yersinia bercovieri SMI Y16-13 SMI  
[C]Yersinia bercovieri SMI Y07-13 SMI  
[C]Yersinia bercovieri SMI 5-12 SMI  
[C]Yersinia bercovieri SMI 24-09 SMI  
[C]Yersinia bercovieri SMI 23-12 SMI  
[C]Yersinia bercovieri SMI 16-12 SMI  
[C]Yersinia bercovieri SMI 14-12 SMI  
[C]Yersinia bercovieri CCUG 37900 SMI  
[C]Vibrio cholerae SMI V6-13 SMI  
[C]Staphylococcus pseudintermedius AB 680 SVA  
[C]Staphylococcus aureus ATCC 29213 SMI  
[C]Pseudomonas aeruginosa ATCC 27853 SMI  
Pasteurella pneumotropica LDJ6208-12  
Pasteurella pneumotropica LDJ507-12

Parengyodontium album UAMH 9836 HKU  
Parengyodontium album UAMH 8313 HKU  
Parengyodontium album UAMH 4512 HKU  
Parengyodontium album UAMH 1441 HKU  
Parengyodontium album UAMH 11234 HKU  
Parengyodontium album UAMH 10043 HKU  
Parengyodontium album NRRL 2312 HKU  
Parengyodontium album IHEM 4198 HKU  
Parengyodontium album HKU48 HKU  
Parengyodontium album CBS 836.71 HKU  
Parengyodontium album CBS 570.71 HKU  
Parengyodontium album CBS 504.83 HKU  
Parengyodontium album CBS 368.72 HKU  
Parengyodontium album CBS 121919 HKU  
Legionella worsleiensis CCUG 44923 SMI  
Legionella waltersii CCUG 44924 SMI  
Legionella wadsworthii ATCC 33877 SMI  
Legionella tucsonensis ATCC 49180 SMI  
Legionella taurinensis SMI L005 SMI  
Legionella taurinensis CCUG 44901 SMI  
Legionella steigerwaltii CCUG 56441 SMI  
Legionella spiritensis ATCC 35249 SMI  
Legionella shakespearei CCUG 31228A SMI  
Legionella sainthelensi SMI L025 SMI  
Legionella rubrilucens SMI L026 SMI  
Legionella rubrilucens SMI L023 SMI  
Legionella rubrilucens SMI L022 SMI  
Legionella rubrilucens SMI L021 SMI  
Legionella rubrilucens SMI L014 SMI  
Legionella rowbothamii CCUG 43886 SMI  
Legionella quinlivanii ATCC 43830 SMI  
Legionella quateirensis CCUG 44899 SMI  
Legionella pneumophila ssp pneumophila OLDA ATCC 43109 SMI  
Legionella pneumophila ssp pneumophila NCTC 11191 SMI  
Legionella pneumophila ssp pneumophila ATCC 43703 SMI  
Legionella pneumophila ssp pneumophila ATCC 43290 SMI  
Legionella pneumophila ssp pneumophila ATCC 43283 SMI  
Legionella pneumophila ssp pneumophila ATCC 43111  
Legionella pneumophila ssp pneumophila ATCC 35096 SMI  
Legionella pneumophila ssp pneumophila ATCC 33823 SMI  
Legionella pneumophila ssp pneumophila ATCC 33215 SMI  
Legionella pneumophila ssp pneumophila ATCC 33154 SMI  
Legionella pneumophila ssp fraseri ATCC 33216 SMI  
Legionella pneumophila ssp fraseri ATCC 33156 SMI  
Legionella pneumophila HPA EQA1 SMI  
Legionella pneumophila ATCC 33152 SMI

Legionella parisiensis ATCC 35299 SMI  
Legionella oakridgensis SMI L013 SMI  
Legionella oakridgensis SMI L012 SMI  
Legionella oakridgensis ATCC 33761 SMI  
Legionella norrlandica SMI LEGN SMI  
Legionella norrlandica SMI 4329II SMI  
Legionella norrlandica SMI 4327I SMI  
Legionella nautarum CCUG 44900 SMI  
Legionella micdadei ATCC 33218 SMI  
Legionella maceachernii SMI 4270I SMI  
Legionella longbeachae SMI L002 SMI  
Legionella longbeachae SMI L001 SMI  
Legionella longbeachae ATCC 33484 SMI  
Legionella longbeachae ATCC 33462 SMI  
Legionella londiniensis ATCC 700510 SMI  
Legionella jordanis ATCC 33623 SMI  
Legionella jordanis 4308I SMI  
Legionella israelensis ATCC 43119 SMI  
Legionella hackeliae ATCC 35250 SMI  
Legionella gresilensis CCUG 45920 SMI  
Legionella gratiana CCUG 44894 SMI  
Legionella gormanii SMI L024 SMI  
Legionella gormanii SMI L006 SMI  
Legionella gormanii ATCC 33297 SMI  
Legionella geestiana CCUG 44893 SMI  
Legionella feeleeii SMI L017 SMI  
Legionella feeleeii SMI L016 SMI  
Legionella feeleeii SMI L015 SMI  
Legionella fallonii CCUG 43887 SMI  
Legionella erythra ATCC 35303 SMI  
Legionella dumoffii ATCC 33279 SMI  
Legionella drozanskii CCUG 43885 SMI  
Legionella dresdenensis CCUG 59858 SMI  
Legionella cincinnatiensis ATCC 43753 SMI  
Legionella cherrii ATCC35252 SMI  
Legionella bozemanii SMI L028 SMI  
Legionella bozemanii SMI L027 SMI  
Legionella bozemanii SMI L020 SMI  
Legionella bozemanii SMI L011 SMI  
Legionella bozemanii SMI L010 SMI  
Legionella bozemanii SMI L008 SMI  
Legionella bozemanii SMI L004 SMI  
Legionella bozemanii SMI L003 SMI  
Legionella bozemanii SMI F41ENK-M SMI  
Legionella bozemanii SMI F41ENK SMI  
Legionella bozemanii ATCC 35545 SMI

Legionella bozemanii ATCC 33217 SMI  
Legionella birminghamiensis ATCC 43702 SMI  
Legionella anisa SMI L019 SMI  
Legionella anisa ATCC 35292 SMI  
Legionella adelaidensis CCUG 31231B SMI  
Lecanicillium tenuipes CBS 658.80 HKU  
Klebsiella pneumoniae KLIN K697 SMI  
Klebsiella pneumoniae KLIN K695 SMI  
Klebsiella pneumoniae KLIN K693 SMI  
Klebsiella pneumoniae KLIN K691 SMI  
Klebsiella pneumoniae KLIN 700 SMI  
Klebsiella pneumoniae CCUG 58547 SMI  
Klebsiella pneumoniae CCUG 58546 SMI  
Klebsiella pneumoniae CCUG 58545 SMI  
Klebsiella pneumoniae CCUG 56233 SMI  
Klebsiella pneumoniae CCUG 45421 SMI  
[C]Francisella tularensis ssp tularensis RKI Schu4 SMI  
[C]Francisella tularensis ssp tularensis FOI FSC046 SMI  
[C]Francisella tularensis ssp tularensis FOI FSC042 SMI  
[C]Francisella tularensis ssp tularensis FOI 237 SMI  
[C]Francisella tularensis ssp tularensis FOI 054 SMI  
[C]Francisella tularensis ssp tularensis FOI 041 SMI  
[C]Francisella tularensis ssp novicida RKI Ft27 SMI  
[C]Francisella tularensis ssp novicida RKI Ft26 SMI  
[C]Francisella tularensis ssp novicida QUANDHIP RG3-05 SMI  
[C]Francisella tularensis ssp mediasiatica RKI Ft31 SMI  
[C]Francisella tularensis ssp mediasiatica RKI Ft24 SMI  
[C]Francisella tularensis ssp holarctica SMI R14-23 SMI  
[C]Francisella tularensis ssp holarctica RKI Q2-6 SMI  
[C]Francisella tularensis ssp holarctica RKI Ft101 6 SMI  
[C]Francisella tularensis ssp holarctica RKI A146 1 SMI  
[C]Francisella tularensis ssp holarctica RKI A104 15 SMI  
[C]Francisella tularensis ssp holarctica RKI A101 4 SMI  
[C]Francisella tularensis ssp holarctica FOI 152 SMI  
[C]Francisella tularensis ssp holarctica FOI 151 SMI  
[C]Francisella tularensis ssp holarctica FOI 133 SMI  
Flavobacterium psychrophilum F510  
Flavobacterium columnare F512  
Engyodontium rectidentatum CBS 641.74 HKU  
Engyodontium rectidentatum CBS 547.82 HKU  
Engyodontium rectidentatum CBS 206.74 HKU  
Engyodontium parvisporum IHEM 22910 HKU  
[C]Burkholderia pseudomallei RKI Q2-1 SMI  
[C]Burkholderia pseudomallei RKI Bp9 SMI  
[C]Burkholderia pseudomallei RKI A173 SMI  
[C]Burkholderia pseudomallei RKI A110 SMI



[C]Burkholderia pseudomallei RKI A106 SMI  
[C]Burkholderia pseudomallei RKI 104 SMI  
[C]Burkholderia mallei RKI Bm9 SMI  
[C]Burkholderia mallei RKI A106 4 SMI  
[C]Burkholderia mallei RKI A106 3 SMI  
[C]Burkholderia mallei RKI A104 4 SMI  
[C]Brucella suis NCTC 1720 SMI  
[C]Brucella suis NCTC 10316 SMI  
[C]Brucella suis NCTC 1030 SMI  
[C]Brucella pinnipedialis NCTC 12890 SMI  
[C]Brucella ovis NCTC 10512 SMI  
[C]Brucella neotomae ATCC 23459 SMI  
[C]Brucella microti CAPM 6434 SMI  
[C]Brucella melitensis SMI R13-100 SMI  
[C]Brucella melitensis SMI R12-209 SMI  
[C]Brucella melitensis RKI A104-11 SMI  
[C]Brucella melitensis NCTC 16M SMI  
[C]Brucella melitensis NCTC 10503 SMI  
[C]Brucella melitensis NCTC 10094 SMI  
[C]Brucella inopinata CAPM 6436 SMI  
[C]Brucella ceti NCTC 12891 SMI  
[C]Brucella canis SVA 007450-2 SMI  
[C]Brucella canis SVA 007041-6 SMI  
[C]Brucella canis NCTC 10854 SMI  
[C]Brucella canis Evira E20140122-166 SMI  
[C]Brucella abortus NCTC 624 SMI  
[C]Brucella abortus NCTC 544 SMI  
[C]Bordetella pertussis SMI 22 SMI  
[C]Bordetella pertussis SMI 17 SMI  
[C]Bordetella parapertussis SMI 18 SMI  
[C]Bordetella parapertussis SMI 16 SMI  
[C]Bordetella bronchiseptica SMI 20 SMI  
[C]Bordetella bronchiseptica SMI 19 SMI  
[C]Bordetella avium SMI 21 SMI  
[C]Bacillus weihenstephanensis DSM 11821 SMI  
[C]Bacillus thuringiensis CIP 105674 SMI  
[C]Bacillus thuringiensis BGSC 4Y1 SMI  
[C]Bacillus thuringiensis BGSC 4BD1 SMI  
[C]Bacillus thuringiensis BGSC 4AW1 SMI  
[C]Bacillus thuringiensis BGSC 4AJ1 SMI  
[C]Bacillus thuringiensis ATCC 35646 SMI  
[C]Bacillus thuringiensis ATCC 10792 SMI  
[C]Bacillus thuringiensis 4CC1 SMI  
[C]Bacillus flexus SMI M14-03 SMI  
[C]Bacillus cereus WSBC 10483 SMI  
[C]Bacillus cereus WSBC 10286 SMI

[C]Bacillus cereus SJ1 SMI  
[C]Bacillus cereus RIVM BC67 SMI  
[C]Bacillus cereus NVH 1518-99 SMI  
[C]Bacillus cereus NVH 0597-99 SMI  
[C]Bacillus cereus NVH 0597-98 SMI  
[C]Bacillus cereus MHI 1305 SMI  
[C]Bacillus cereus MHI 13 SMI  
[C]Bacillus cereus IH41385 SMI  
[C]Bacillus cereus F837-76 SMI  
[C]Bacillus cereus F4810-72 SMI  
[C]Bacillus cereus F2085-98 SMI  
[C]Bacillus cereus ATCC 4342 SMI  
[C]Bacillus cereus ATCC 10987 SMI  
[C]Bacillus cereus ATCC 10702 SMI  
[C]Bacillus anthracis SVA11-BKT082753 SMI  
[C]Bacillus anthracis SVA081216 SMI  
[C]Bacillus anthracis SVA 13Bakt082753 SMI  
[C]Bacillus anthracis SMI R82-04 SMI  
[C]Bacillus anthracis NC08234 SMI  
[C]Bacillus anthracis NC07753-03 SMI  
[C]Bacillus anthracis NC07752-04 SMI  
[C]Bacillus anthracis NC01328  
[C]Bacillus anthracis ATCC 4229 SMI  
[C]Bacillus anthracis 7702 SMI  
[C]Bacillus anthracis 10340 SMI  
[C]Bacillus anthracis 05444-02 SMI  
[C]Bacillus anthracis 02620-03 SMI  
[C]Bacillus anthracis 00109-03 SMI  
Acinetobacter haemolyticus SMI A058 SMI

## 2. FoodBIMS

Mass spectra of strains from 11 different genera (*Escherichia*, *Listeria*, *Yersinia*, *Staphylococcus*, *Salmonella*, *Micrococcus*, *Morganella*, *Pseudomonas*, *Proteus*, *Sarcina*, *Lactobacillus*) were obtained from FoodBIMS by Institute of Food Sciences, National Research Council of Italy:

*Yersinia kristensenii* NCTC 11471 / ATCC 33638  
*Yersinia intermedia* NCTC 11469 / ATCC 29909  
*Yersinia frederiksenii* NCTC 11470 / ATCC 33641  
*Yersinia enterocolitica* subsp. *Enterocolitica* DSM 9499 / NCTC 11174 / ATCC 700823  
*Yersinia enterocolitica* subsp.  
*Staphylococcus aureus* ATCC 6538 / DSM 799 / NCTC 10788  
[C]*Staphylococcus aureus* ATCC 25923  
[C]*Staphylococcus aureus* ATCC 14458  
*Sarcina flava*  
[C]*Salmonella typhimurium* ATCC 6994

Salmonella enteritidis  
[C]Pseudomonas putida  
[C]Pseudomonas fluorescens  
Proteus vulgaris  
Proteus mirabilis  
Morganella morganii  
Micrococcus spp  
Listeria welshimeri  
Listeria seeligeri  
Listeria monocytogenes type strain ATCC 15313 / NCTC 10357  
[C]Listeria monocytogenes ATCC 9525  
Listeria monocytogenes ATCC 19114 / 5214  
[C]Listeria ivanovii 750  
Listeria innocua  
Leuconostoc mesenteroides  
[C]Lactococcus lactis  
[C]Escherichia vulneris DSMZ 4564  
[C]Escherichia fergusonii DSMZ 13698  
[C]Escherichia coli  
[C]Escherichia coli O157 H7 NCTC  
[C]Escherichia coli DSMZ 9033  
[C]Escherichia coli DSMZ 9031  
[C]Escherichia coli DSMZ 9030  
[C]Escherichia coli DSMZ 9029  
[C]Escherichia coli DSMZ 9024  
[C]Escherichia coli DSMZ 8711  
[C]Escherichia coli DSMZ 8700  
[C]Escherichia coli DSMZ 8696  
[C]Escherichia coli DSMZ 8695  
[C]Escherichia coli DSMZ 5802  
[C]Escherichia coli DSMZ 301  
[C]Escherichia coli DSMZ 30083  
[C]Escherichia coli DSMZ 11752  
[C]Escherichia coli DSMZ 10722

### 3. URMS spectra

Mass spectra of 90 species of microorganisms were obtained from URMS Database by Unité des Rickettsies, France:

Acidaminococcus massiliensis CSUR P2828  
Vaginella massiliensis CSUR P2517  
Timonella senegalensis  
Streptococcus timonensis CSUR P2915  
Senegalemassilia anaerobia  
Ruminococcus phoceensis CSUR P2086

Romboutsia timonensis CSUR P326  
Rasbobacterium massiliensis  
Prevotella phoceensis CSUR P2259  
Prevotella caccae CSUR P2931  
Peptoniphilus vaginalis  
Peptoniphilus timonensis  
Peptoniphilus senegalensis  
Peptoniphilus phoceensis CSUR P2183  
Peptoniphilus pacaensis  
Peptoniphilus obesi  
Peptoniphilus grossensis  
Peptoniphilus duodenumensis CSUR P2932  
Peptoniphilus raoultii  
Paenibacillus ihumii CSUR P1981  
Olsenella phoceensis CSUR P2936  
Olegusella massiliensis  
Oceanobacillus massiliensis  
Nesterenkonia massiliensis  
Neglecta timonensis CSUR P2265  
Negativicoccus massiliensis CSUR P2082  
Murdochiella vaginalis  
Micromassilia vaginalis CSUR P2986  
Megasphaera massiliensis  
Mediterranea massiliensis CSUR P2645  
Massiliomicrobiota timonensis CSUR P2264  
Massilioculturomica massiliensis CSUR P2935  
Marseilla massiliensis CSUR P2745  
Levasseurella massiliensis CSUR P3275  
Lascolacoccus vaginalis  
Lascolabacillus massiliensis  
Lachnoclostridium touaregense CSUR P2415  
Lachnoclostridium massiliosenegalense CSUR P299  
Kallipyga massiliensis  
Intestinimonas massiliensis CSUR P1930  
Ihuprevotella massiliensis CSUR P2826  
Hugonella massiliensis CSUR P2118  
Haloferax massiliensis CSUR P194  
Fusobacterium massiliensis CSUR P2749  
Fournierella massiliensis CSUR P2014  
Ezakiella massiliensis CSUR P2951  
Enterococcus massiliensis CSUR P1928  
Enterobacter massiliensis  
Enorma massiliensis  
Emergencia timonense CSUR P2260  
Eisenbergiella massiliensis CSUR P2120  
Duodena massiliensis CSUR P2968

*Dielma fastidiosa*  
*Corynebacterium timonense*  
*Corynebacterium jeddahense*  
*Corynebacterium fournierii* CSUR P2948  
*Colonella massiliensis* CSUR P2911  
*Collinsella vaginalis* CSUR P2666  
*Clostridium senegalense*  
*Clostridium saudii*  
*Clostridium nigeriense* CSUR P2414  
*Clostridium massiliodielmoense* CSUR P2255  
*Clostridium jeddahense*  
*Clostridium dakareense*  
*Clostridium bouchedurhonense* CSUR P2181  
*Christensenella timonensis* CSUR P2437  
*Christensenella massiliensis* CSUR P2438  
*Cellulomonas massiliensis*  
*Caecumella massiliensis* CSUR P2974  
*Butyricimonas phoceensis* CSUR P2742  
*Brevibacillus massiliensis*  
*Bretellus vaginalis* CSUR P2746  
*Blautia timonensis* CSUR P2398  
*Bartonella florenciae*  
*Bariatricus massiliensis* CSUR P2221  
*Bacteroides mediterraneense* CSUR P2644  
[C]*Bacillus timonensis*  
[C]*Bacillus massiliosenegalensis*  
[C]*Bacillus massilionigeriensis* CSUR P2366  
[C]*Bacillus massilioglaciei* CSUR P2600P  
*Arcanobacterium urinomassiliense* CSUR P3240  
*Anaerotruncus massiliensis* CSUR P2007  
*Anaeromassilibacillus senegalense* CSUR P1511  
*Anaerococcus mediterraneensis* CSUR P2765  
*Alistipes timonensis*  
*Alistipes senegalensis*  
*Alistipes obesi*  
*Africanella massiliensis* CSUR P2538  
*Actinomyces ihumii* CSUR P2006  
*Actinomyces bouchedurhonensis* CSUR P2825

#### 4. EMbaRC Spectra

Mass spectra of 204 species of microorganisms were obtained from European Consortium of Microbial Resources Centres.

[C]Bacillus amyloliquefaciens ssp amyloliquefaciens DSM 7  
[C]Bacillus anthracis A112  
[C]Bacillus anthracis A119  
[C]Bacillus anthracis A126  
[C]Bacillus anthracis A128  
[C]Bacillus anthracis A133  
[C]Bacillus anthracis A38  
[C]Bacillus anthracis A86  
[C]Bacillus anthracis ATCC 4229  
[C]Bacillus anthracis NC01328 SMI  
[C]Bacillus cereus ATCC 10987  
[C]Bacillus cereus B10  
[C]Bacillus cereus B108  
[C]Bacillus cereus B146  
[C]Bacillus cereus B16  
[C]Bacillus cereus B181  
[C]Bacillus cereus B185  
[C]Bacillus cereus B192  
[C]Bacillus cereus B194  
[C]Bacillus cereus B198  
[C]Bacillus cereus B238  
[C]Bacillus cereus B245  
[C]Bacillus cereus B252  
[C]Bacillus cereus B253  
[C]Bacillus cereus B256  
[C]Bacillus cereus B257  
[C]Bacillus cereus B260  
[C]Bacillus cereus B265  
[C]Bacillus cereus B271  
[C]Bacillus cereus B272  
[C]Bacillus cereus B274  
[C]Bacillus cereus B277  
[C]Bacillus cereus B289  
[C]Bacillus cereus B294  
[C]Bacillus cereus B296  
[C]Bacillus cereus B297  
[C]Bacillus cereus B298  
[C]Bacillus cereus B299  
[C]Bacillus cereus B300  
[C]Bacillus cereus B304  
[C]Bacillus cereus B305

[C]Bacillus cereus B306  
[C]Bacillus cereus B309  
[C]Bacillus cereus B329  
[C]Bacillus cereus B33  
[C]Bacillus cereus B332  
[C]Bacillus cereus B69  
[C]Bacillus cereus DSM 4490  
[C]Bacillus cereus WIS-St. Nr. 283 ATCC 12826  
[C]Bacillus cereus WIS-St. Nr. 29  
[C]Bacillus cereus WSBC 10441  
[C]Bacillus cereus biovar anthracis Affenstamm (B) SK1b  
[C]Bacillus mycoides DSM2048  
[C]Bacillus subtilis B130  
[C]Bacillus subtilis B154  
[C]Bacillus subtilis B156  
[C]Bacillus subtilis DSM 10  
[C]Bacillus subtilis DSM 347  
[C]Bacillus subtilis WIS-St. Nr. 491  
[C]Bacillus subtilis ssp. inaquosorum DSM 22148  
[C]Escherichia coliNm I  
[C]Escherichia coli 08 01585  
[C]Escherichia coli ATCC 25922 DSM 1103  
[C]Escherichia coli DSM 3871 (K12)  
[C]Escherichia coli NCTC 104118  
[C]Escherichia coli O157 H7 380 UD  
[C]Escherichia coli O157 H7 381  
[C]Escherichia coli O157 H7 643  
[C]Escherichia coli O157 H7 719  
[C]Escherichia coli O157 H7 ATCC 43894  
[C]Escherichia coli O157 H7 ED 82  
[C]Escherichia coli O157 H7 MI 380  
[C]Escherichia coli RKI A139-1  
[C]Escherichia coli RKI A139-2  
Klebsiella oxytoca ATCC 13182  
Klebsiella oxytoca CCUG 15788  
Klebsiella oxytoca Oman 61  
Klebsiella pneumoniae ssp ozeanae ATCC 25926  
[C]Lactobacillus amylovorus CECT 4132T  
[C]Lactobacillus amylovorus DSM 20531T  
[C]Lactobacillus amylovorus LMG 9496T  
[C]Lactobacillus brevis CECT 4121T  
[C]Lactobacillus brevis CECT 4669  
[C]Lactobacillus brevis CECT 5172  
[C]Lactobacillus brevis CECT 5354  
[C]Lactobacillus brevis CECT 5918  
[C]Lactobacillus brevis DSM 20054T

[C]Lactobacillus brevis DSM 20556  
[C]Lactobacillus brevis LMG 6906T  
[C]Lactobacillus coryniformis subsp. coryniformis LMG 9196T  
[C]Lactobacillus crispatus CIP 102990T  
[C]Lactobacillus crispatus DSM 20584T  
[C]Lactobacillus delbrueckii subsp. bulgaricus DSM 20080  
[C]Lactobacillus delbrueckii subsp. delbrueckii DSM 20074T  
[C]Lactobacillus delbrueckii subsp. lactis CIP 101028T  
[C]Lactobacillus delbrueckii subsp. lactis CIP 53\_61  
[C]Lactobacillus delbrueckii subsp. lactis CIP 54\_4  
[C]Lactobacillus fermentum CECT 4007T  
[C]Lactobacillus fermentum CECT 562  
[C]Lactobacillus fermentum CIP 53\_163  
[C]Lactobacillus gallinarum DSM 10532T  
[C]Lactobacillus gallinarum LMG 9435T  
[C]Lactobacillus gasseri DSM 20077  
[C]Lactobacillus iners DSM 13335T  
[C]Lactobacillus paracasei LMG 9192T  
[C]Lactobacillus paracasei subsp. paracasei CIP 103918T  
[C]Lactobacillus paracasei subsp. paracasei LMG 13087T  
[C]Lactobacillus paracasei subsp. paracasei LMG 9438  
[C]Lactobacillus paracasei subsp. tolerans CECT 4175T  
[C]Lactobacillus paracasei subsp. tolerans CIP 103024T  
[C]Lactobacillus paracasei subsp. tolerans DSM 20258T  
[C]Lactobacillus paracasei subsp. tolerans LMG 9191T  
[C]Lactobacillus pentosus CIP 103156T  
[C]Lactobacillus pentosus LMG 10755T  
[C]Lactobacillus plantarum CIP 71\_39  
[C]Lactobacillus plantarum subsp. argentoratensis LMG 9205T  
[C]Lactobacillus reuteri CIP 101887T  
[C]Lactobacillus sanfranciscensis LMG 16002T  
[C]Lactococcus garvieae DSM 20064  
[C]Lactococcus garvieae DSM 20684T  
[C]Lactococcus lactis subsp. lactis DSM 20250  
Legionella longbeachae ATCC 33462 SMI  
Legionella longbeachae SMI L001 SMI  
[C]Listeria monocytogenes type strain ATCC 15313 NCTC 10357  
[C]Pseudomonas aeruginosaA-269\_02 B  
[C]Pseudomonas aeruginosa CECT 4407  
[C]Pseudomonas aeruginosa CIP 103282  
[C]Pseudomonas aeruginosa CIP 103467  
[C]Pseudomonas aeruginosa CIP 103837  
[C]Pseudomonas aeruginosa CIP 104116  
[C]Pseudomonas aeruginosa CIP 104467  
[C]Pseudomonas aeruginosa CIP 105094  
[C]Pseudomonas aeruginosa CIP 59\_35



[C]Pseudomonas aeruginosa CIP 59\_43  
[C]Pseudomonas aeruginosa DSM 1117  
[C]Pseudomonas aeruginosa DSM 1128  
[C]Pseudomonas aeruginosa DSM 1253  
[C]Pseudomonas aeruginosa DSM 1299  
[C]Pseudomonas aeruginosa DSM 3227  
[C]Pseudomonas aeruginosa DSM 46358  
[C]Pseudomonas aeruginosa DSM 50069  
[C]Pseudomonas aeruginosa DSM 50071T  
[C]Pseudomonas aeruginosa DSM 939  
[C]Pseudomonas aeruginosa HST 50426  
[C]Pseudomonas brassicacearum subsp. brassicacearum DSM 13227T  
[C]Pseudomonas chlororaphis CECT 4470T  
[C]Pseudomonas chlororaphis subsp. aureofaciens DSM 6698T  
[C]Pseudomonas chlororaphis subsp. chlororaphis DSM 50083T  
[C]Pseudomonas fluorescens CECT 378T  
[C]Pseudomonas fluorescens DSM 50090T  
[C]Pseudomonas fluorescens DSM 50091  
[C]Pseudomonas fluorescens DSM 50108  
[C]Pseudomonas meliae DSM 6759T  
[C]Pseudomonas mendocina DSM 50017T  
[C]Pseudomonas psychrotolerans DSM 15758T  
[C]Pseudomonas putida CECT 324T  
[C]Pseudomonas putida DSM 084  
[C]Pseudomonas putida DSM 12735  
[C]Pseudomonas putida DSM 291T  
[C]Pseudomonas putida DSM 3263  
[C]Pseudomonas putida DSM 46608  
[C]Pseudomonas putida DSM 50026  
[C]Pseudomonas putida DSM 7314  
[C]Pseudomonas putida II  
[C]Pseudomonas stutzeri CECT 930T  
[C]Pseudomonas stutzeri DSM 13592  
[C]Pseudomonas stutzeri DSM 13627  
[C]Pseudomonas stutzeri DSM 50227  
[C]Pseudomonas stutzeri DSM 5190T  
[C]Pseudomonas stutzeri DSM 6082  
[C]Pseudomonas syringae DSM 10604T  
[C]Pseudomonas syringae DSM 50312  
[C]Pseudomonas syringae DSM 50315  
[C]Salmonella enterica serovar minnesota SF 1111  
[C]Salmonella typhimurium T104 08 01627  
[C]Vibrio alginolyticus CECT 521T  
[C]Vibrio breoganii CECT 7222T  
[C]Vibrio cholerae A171-1  
[C]Vibrio cholerae A222

[C]Vibrio cholerae A225 O1 Toxin positiv  
[C]Vibrio cholerae A226-1  
[C]Vibrio cholerae A227  
[C]Vibrio cholerae A240  
[C]Vibrio cholerae A312  
[C]Vibrio cholerae A313  
[C]Vibrio cholerae A314  
[C]Vibrio cholerae A325  
[C]Vibrio cholerae A327  
[C]Vibrio cholerae A339  
[C]Vibrio cholerae A351  
[C]Vibrio cholerae A361  
[C]Vibrio cholerae A371 O1 Toxin negativ  
[C]Vibrio cholerae A378  
[C]Vibrio cholerae Inaba 1573  
[C]Vibrio cholerae NIH35A3  
[C]Vibrio harveyi CECT 525T  
[C]Vibrio mimicus CECT 4218T  
[C]Yersinia enterocolitica DSM 4780  
[C]Yersinia enterocolitica O15 31089  
[C]Yersinia enterocolitica O3 29211  
[C]Yersinia enterocolitica O50,51 1  
[C]Yersinia enterocolitica O9 7192  
[C]Yersinia frederiksenii NCTC 11470 ATCC 33641  
[C]Yersinia pestis 10329

### S3: Optimization of the number of the most informative genes for bacterial identification (Figure S1)

We have assessed the effect of using 5, 10 and 15 most informative genes for the library-free MALDI-TOF MS bacterial identification. The most informative genes were obtained individually with the double cross-validation procedure. As shown in **Figure S1**, identification accuracy was clearly lower using 5 genes. The identification accuracies were similar using 10 or 15 most informative genes, while the computation time was much longer when 15 most informative genes were considered. Therefore, the 10 most informative genes were used in this study for library-free MALDI-TOF MS bacterial identification.

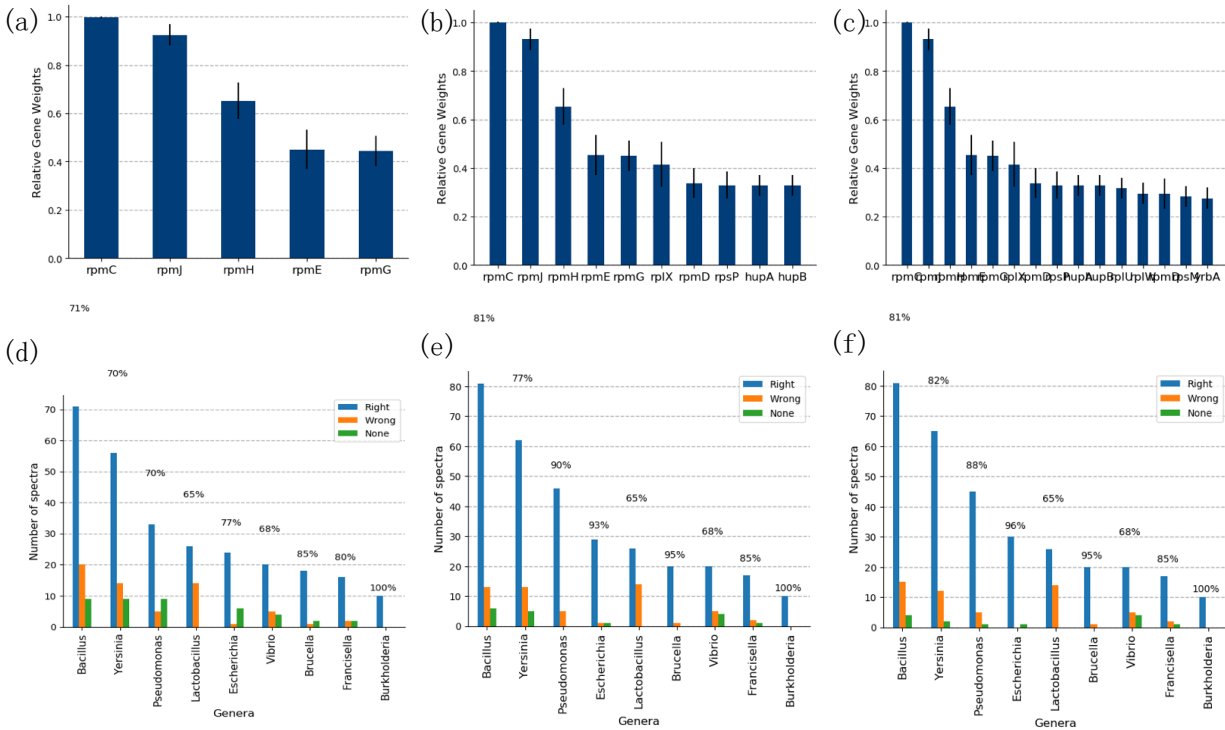

**Figure S1.** The 5 (a), 10 (b) and 15 (c) most informative genes obtained with the double cross-validation procedure. Identification accuracy of mass spectra from different genera using the 5 (d), 10 (e) and 15 (f) most informative genes.

#### S4: Example of identification

For clarity, we present here an example mass spectrum identification obtained from *Bacillus anthracis* with our algorithms.

Usually, the gene weights table ( $W$ ) is obtained from double cross-validation training. But in this example, we use the gene weights presented in **Figure 3**:

|      |        |
|------|--------|
| rpmc | 0.9993 |
| rpmj | 0.9311 |
| rpmh | 0.6529 |
| rpme | 0.4537 |
| rpmg | 0.4510 |
| rplx | 0.4146 |
| rpmd | 0.3375 |
| rpsp | 0.3289 |
| hupa | 0.3284 |
| hupb | 0.3271 |

Calculation details of spectrum identification:

##### Step 1:

Get the molecular weight comparison matrix ( $M$ ), where the columns correspond to different genes and the rows correspond to different species. The numbers in the cells correspond to the molecular weight of the proteins encoded by the genes in the species obtained from UniProt.

The comparison matrix ( $M$ , 1276 rows  $\times$  10 columns) is:

| entry | rpmc | rpmj | rpmh | rpme | rpmg | rplx  | rpmd | rpsp  | hupa | hupb |
|-------|------|------|------|------|------|-------|------|-------|------|------|
| 0     | 7435 | 4265 | 5175 | 8300 | 6090 | 11096 | 6610 | 9200  | 0    | 9089 |
| 1     | 7434 | 4265 | 5175 | 8316 | 6090 | 11303 | 6638 | 9342  | 0    | 9308 |
| 2     | 7449 | 4265 | 5175 | 8261 | 6104 | 11227 | 6628 | 11324 | 0    | 0    |
| 3     | 7409 | 4265 | 5175 | 8314 | 6104 | 11166 | 6613 | 9326  | 0    | 0    |
| 4     | 7395 | 4265 | 5175 | 8569 | 6090 | 11203 | 6613 | 9326  | 0    | 0    |
| 5     | 7380 | 0    | 5175 | 8429 | 6104 | 11147 | 6626 | 9340  | 0    | 0    |
| 6     | 7405 | 4251 | 5175 | 8371 | 6090 | 11219 | 6642 | 9300  | 0    | 0    |
| 7     | 7435 | 4265 | 5175 | 8245 | 6090 | 11181 | 6628 | 9200  | 0    | 9322 |
| 8     | 7395 | 4265 | 5175 | 8287 | 6090 | 11243 | 6611 | 9312  | 0    | 0    |
| 9     | 7337 | 4265 | 5175 | 8273 | 6090 | 11187 | 6610 | 9340  | 0    | 0    |
| 10    | 7449 | 4265 | 5175 | 8314 | 6090 | 11123 | 6610 | 9326  | 0    | 0    |
| 11    | 7379 | 4265 | 5175 | 8314 | 6104 | 11156 | 6627 | 9326  | 0    | 9250 |
| 12    | 7449 | 4265 | 5175 | 8330 | 6104 | 11227 | 6628 | 9356  | 0    | 0    |
| 13    | 7449 | 4265 | 5175 | 8289 | 6104 | 11173 | 6642 | 9342  | 0    | 9294 |
| 14    | 7435 | 4265 | 5175 | 8357 | 6104 | 11202 | 6626 | 9326  | 0    | 0    |
| 15    | 7395 | 4265 | 5175 | 8401 | 6104 | 11146 | 6610 | 9326  | 0    | 9222 |
| 16    | 7449 | 4265 | 5175 | 8344 | 6104 | 11201 | 6642 | 9326  | 0    | 9320 |

|      |      |      |      |       |      |       |      |      |      |      |
|------|------|------|------|-------|------|-------|------|------|------|------|
| 17   | 7435 | 4265 | 5175 | 8328  | 6090 | 11181 | 6642 | 9200 | 0    | 0    |
| 18   | 7395 | 4265 | 5175 | 8244  | 6090 | 11158 | 6595 | 9340 | 0    | 9105 |
| 19   | 7380 | 4265 | 5175 | 8219  | 6090 | 11381 | 6654 | 9396 | 0    | 0    |
| 20   | 7435 | 4265 | 5175 | 8328  | 6090 | 11167 | 6642 | 9170 | 0    | 0    |
| 21   | 7435 | 4265 | 5175 | 8245  | 6104 | 10000 | 6628 | 9200 | 0    | 0    |
| 22   | 7449 | 4265 | 5175 | 8316  | 6104 | 11175 | 6628 | 9372 | 0    | 0    |
| 23   | 7435 | 4265 | 5175 | 8328  | 6090 | 11181 | 6642 | 9200 | 0    | 9322 |
| 24   | 7419 | 4265 | 5175 | 8328  | 6090 | 11287 | 6626 | 9356 | 0    | 0    |
| 25   | 7421 | 4265 | 5175 | 8371  | 6090 | 11248 | 6654 | 9311 | 0    | 0    |
| 26   | 7452 | 4265 | 5175 | 8300  | 6090 | 11128 | 6568 | 9352 | 0    | 0    |
| 27   | 7449 | 4265 | 5175 | 8344  | 6090 | 11167 | 6642 | 9200 | 0    | 0    |
| 28   | 7421 | 4265 | 5175 | 8344  | 6090 | 11303 | 6638 | 9372 | 0    | 0    |
| 29   | 7395 | 4265 | 5175 | 8399  | 6104 | 11233 | 6642 | 9326 | 0    | 0    |
| ...  | ...  | ...  | ...  | ...   | ...  | ...   | ...  | ...  | ...  | ...  |
| 1246 | 7282 | 4755 | 5310 | 9268  | 6406 | 11284 | 7189 | 9650 | 0    | 0    |
| 1247 | 7237 | 4872 | 5310 | 9364  | 6406 | 11226 | 7207 | 9546 | 0    | 9328 |
| 1248 | 7249 | 4872 | 5310 | 9264  | 6388 | 11240 | 7117 | 9657 | 0    | 0    |
| 1249 | 7249 | 4872 | 5310 | 10491 | 6406 | 11240 | 6316 | 0    | 0    | 0    |
| 1250 | 7135 | 4872 | 5148 | 9445  | 6353 | 11170 | 7248 | 9177 | 0    | 0    |
| 1251 | 7237 | 4872 | 5310 | 9363  | 6406 | 11226 | 7207 | 9546 | 0    | 0    |
| 1252 | 7237 | 4872 | 5310 | 8907  | 6392 | 11173 | 7180 | 9534 | 0    | 0    |
| 1253 | 7237 | 4872 | 5310 | 9364  | 6406 | 11240 | 7207 | 9546 | 0    | 0    |
| 1254 | 0    | 4872 | 5310 | 9304  | 0    | 0     | 0    | 0    | 0    | 0    |
| 1255 | 7207 | 4842 | 5367 | 9378  | 6229 | 11128 | 7198 | 9662 | 0    | 0    |
| 1256 | 7207 | 4867 | 5367 | 9389  | 6260 | 11156 | 7162 | 9572 | 0    | 9377 |
| 1257 | 7237 | 4872 | 5310 | 9304  | 6406 | 11240 | 7207 | 9602 | 0    | 0    |
| 1258 | 7237 | 4872 | 5310 | 9304  | 6406 | 11226 | 7207 | 9647 | 0    | 0    |
| 1259 | 7261 | 0    | 5440 | 7769  | 6358 | 11328 | 6546 | 9039 | 9593 | 0    |
| 1260 | 7261 | 0    | 5412 | 7838  | 6358 | 11344 | 6546 | 9068 | 9635 | 0    |
| 1261 | 7261 | 4349 | 5412 | 7767  | 6358 | 11344 | 6546 | 9054 | 9548 | 9238 |
| 1262 | 0    | 5420 | 0    | 0     | 0    | 0     | 0    | 0    | 0    | 0    |
| 1263 | 7261 | 4349 | 5412 | 7767  | 6358 | 11314 | 6546 | 9038 | 9560 | 9238 |
| 1264 | 7261 | 0    | 5412 | 7767  | 6358 | 11314 | 6546 | 9038 | 9607 | 0    |
| 1265 | 7261 | 0    | 5412 | 7781  | 6358 | 11314 | 6546 | 9068 | 9635 | 0    |
| 1266 | 7261 | 0    | 5412 | 7838  | 6358 | 11344 | 6546 | 9054 | 9635 | 0    |
| 1267 | 7261 | 5464 | 5412 | 7838  | 6358 | 11344 | 6546 | 9054 | 9635 | 0    |
| 1268 | 7261 | 0    | 5426 | 7781  | 6358 | 11344 | 6546 | 9068 | 9637 | 0    |
| 1269 | 7274 | 0    | 5426 | 7827  | 6372 | 11374 | 6546 | 9010 | 9591 | 0    |
| 1270 | 5733 | 4349 | 5426 | 7782  | 6358 | 11347 | 6546 | 9096 | 9661 | 9268 |
| 1271 | 7274 | 4349 | 5426 | 7782  | 6358 | 11347 | 6546 | 9096 | 9661 | 9268 |
| 1272 | 7261 | 0    | 5426 | 7767  | 6358 | 11344 | 6546 | 9038 | 9635 | 0    |
| 1273 | 7246 | 4349 | 5426 | 7781  | 6358 | 11344 | 6546 | 9068 | 0    | 0    |
| 1274 | 7274 | 0    | 5426 | 7782  | 6358 | 11347 | 6546 | 9096 | 9661 | 0    |
| 1275 | 7274 | 0    | 5426 | 7782  | 6358 | 11347 | 6546 | 9096 | 9661 | 0    |

**Step 2:**

Get the difference matrix (**C**) using the comparison matrix (**M**) and input mass spectrum peaks (**P**) with the formula (2) in the manuscript.

The difference matrix (**C**, 1276 rows  $\times$  10 columns) is:

| entry | rpmc | rpmj | rpmh | rpme | rpmg | rplx | rpmd | rpsp | hupa | hupb |
|-------|------|------|------|------|------|------|------|------|------|------|
| 0     | 0.0  | 0.00 | 0.84 | 0.00 | 0.00 | 0.00 | 0.00 | 0.00 | 0.00 | 0.00 |
| 1     | 0.0  | 0.00 | 0.84 | 0.00 | 0.00 | 0.00 | 0.00 | 0.00 | 0.00 | 0.00 |
| 2     | 0.0  | 0.00 | 0.84 | 0.00 | 0.00 | 0.60 | 0.00 | 0.00 | 0.00 | 0.00 |
| 3     | 0.0  | 0.00 | 0.84 | 0.00 | 0.00 | 0.00 | 0.58 | 0.74 | 0.00 | 0.00 |
| 4     | 0.0  | 0.00 | 0.84 | 0.00 | 0.00 | 0.00 | 0.58 | 0.74 | 0.00 | 0.00 |
| 5     | 0.0  | 0.00 | 0.84 | 0.00 | 0.00 | 0.00 | 0.00 | 0.00 | 0.00 | 0.00 |
| 6     | 0.0  | 0.00 | 0.84 | 0.00 | 0.00 | 0.00 | 0.00 | 0.00 | 0.00 | 0.00 |
| 7     | 0.0  | 0.00 | 0.84 | 0.00 | 0.00 | 0.00 | 0.00 | 0.00 | 0.00 | 0.88 |
| 8     | 0.0  | 0.00 | 0.84 | 0.00 | 0.00 | 0.40 | 0.43 | 0.00 | 0.00 | 0.00 |
| 9     | 0.0  | 0.00 | 0.84 | 0.00 | 0.00 | 0.00 | 0.00 | 0.00 | 0.00 | 0.00 |
| 10    | 0.0  | 0.00 | 0.84 | 0.00 | 0.00 | 0.00 | 0.00 | 0.74 | 0.00 | 0.00 |
| 11    | 0.0  | 0.00 | 0.84 | 0.00 | 0.00 | 0.00 | 0.00 | 0.74 | 0.00 | 0.00 |
| 12    | 0.0  | 0.00 | 0.84 | 0.00 | 0.00 | 0.60 | 0.00 | 0.00 | 0.00 | 0.00 |
| 13    | 0.0  | 0.00 | 0.84 | 0.00 | 0.00 | 0.00 | 0.00 | 0.00 | 0.00 | 0.53 |
| 14    | 0.0  | 0.00 | 0.84 | 0.00 | 0.00 | 0.00 | 0.00 | 0.74 | 0.00 | 0.00 |
| 15    | 0.0  | 0.00 | 0.84 | 0.00 | 0.00 | 0.00 | 0.00 | 0.74 | 0.00 | 0.00 |
| 16    | 0.0  | 0.00 | 0.84 | 0.00 | 0.00 | 0.00 | 0.00 | 0.74 | 0.00 | 0.71 |
| 17    | 0.0  | 0.00 | 0.84 | 0.00 | 0.00 | 0.00 | 0.00 | 0.00 | 0.00 | 0.00 |
| 18    | 0.0  | 0.00 | 0.84 | 0.00 | 0.00 | 0.00 | 0.00 | 0.00 | 0.00 | 0.00 |
| 19    | 0.0  | 0.00 | 0.84 | 0.00 | 0.00 | 0.00 | 0.00 | 0.00 | 0.00 | 0.00 |
| 20    | 0.0  | 0.00 | 0.84 | 0.00 | 0.00 | 0.00 | 0.00 | 0.00 | 0.00 | 0.00 |
| 21    | 0.0  | 0.00 | 0.84 | 0.00 | 0.00 | 0.00 | 0.00 | 0.00 | 0.00 | 0.00 |
| 22    | 0.0  | 0.00 | 0.84 | 0.00 | 0.00 | 0.00 | 0.00 | 0.00 | 0.00 | 0.00 |
| 23    | 0.0  | 0.00 | 0.84 | 0.00 | 0.00 | 0.00 | 0.00 | 0.00 | 0.00 | 0.88 |
| 24    | 0.0  | 0.00 | 0.84 | 0.00 | 0.00 | 0.00 | 0.00 | 0.00 | 0.00 | 0.00 |
| 25    | 0.0  | 0.00 | 0.84 | 0.00 | 0.00 | 0.00 | 0.00 | 0.00 | 0.00 | 0.00 |
| 26    | 0.0  | 0.00 | 0.84 | 0.00 | 0.00 | 0.00 | 0.55 | 0.00 | 0.00 | 0.00 |
| 27    | 0.0  | 0.00 | 0.84 | 0.00 | 0.00 | 0.00 | 0.00 | 0.00 | 0.00 | 0.00 |
| 28    | 0.0  | 0.00 | 0.84 | 0.00 | 0.00 | 0.00 | 0.00 | 0.00 | 0.00 | 0.00 |
| 29    | 0.0  | 0.00 | 0.84 | 0.00 | 0.00 | 0.98 | 0.00 | 0.74 | 0.00 | 0.00 |
| ...   | ...  | ...  | ...  | ...  | ...  | ...  | ...  | ...  | ...  | ...  |
| 1253  | 0.0  | 0.00 | 0.00 | 0.00 | 0.00 | 0.00 | 0.00 | 0.55 | 0.00 | 0.00 |
| 1254  | 0.0  | 0.00 | 0.00 | 0.00 | 0.00 | 0.55 | 0.00 | 0.00 | 0.00 | 0.60 |
| 1255  | 0.0  | 0.00 | 0.00 | 0.00 | 0.00 | 0.53 | 0.00 | 0.00 | 0.00 | 0.00 |
| 1256  | 0.0  | 0.00 | 0.00 | 0.00 | 0.00 | 0.53 | 0.00 | 0.00 | 0.00 | 0.00 |
| 1257  | 0.0  | 0.00 | 0.00 | 0.00 | 0.00 | 0.00 | 0.00 | 0.00 | 0.00 | 0.00 |
| 1258  | 0.0  | 0.00 | 0.00 | 0.00 | 0.00 | 0.55 | 0.00 | 0.00 | 0.00 | 0.00 |
| 1259  | 0.0  | 0.00 | 0.00 | 0.00 | 0.00 | 0.00 | 0.00 | 0.00 | 0.00 | 0.00 |

|      |     |      |      |      |      |      |      |      |      |      |
|------|-----|------|------|------|------|------|------|------|------|------|
| 1260 | 0.0 | 0.00 | 0.00 | 0.00 | 0.00 | 0.53 | 0.00 | 0.00 | 0.00 | 0.00 |
| 1261 | 0.0 | 0.00 | 0.00 | 0.00 | 0.00 | 0.00 | 0.00 | 0.00 | 0.00 | 0.00 |
| 1262 | 0.0 | 0.00 | 0.00 | 0.00 | 0.47 | 0.00 | 0.00 | 0.00 | 0.00 | 0.00 |
| 1263 | 0.0 | 0.00 | 0.00 | 0.00 | 0.46 | 0.00 | 0.53 | 0.00 | 0.00 | 0.00 |
| 1264 | 0.0 | 0.00 | 0.00 | 0.00 | 0.00 | 0.53 | 0.00 | 0.38 | 0.00 | 0.00 |
| 1265 | 0.0 | 0.00 | 0.00 | 0.00 | 0.00 | 0.55 | 0.00 | 0.76 | 0.00 | 0.00 |
| 1266 | 0.0 | 0.00 | 0.00 | 0.70 | 0.00 | 0.00 | 0.00 | 0.00 | 0.00 | 0.00 |
| 1267 | 0.0 | 0.00 | 0.00 | 0.00 | 0.00 | 0.00 | 0.00 | 0.00 | 0.38 | 0.00 |
| 1268 | 0.0 | 0.00 | 0.00 | 0.54 | 0.00 | 0.00 | 0.00 | 0.00 | 0.00 | 0.00 |
| 1269 | 0.0 | 0.85 | 0.00 | 0.00 | 0.00 | 0.00 | 0.00 | 0.00 | 0.00 | 0.00 |
| 1270 | 0.0 | 0.00 | 0.00 | 0.54 | 0.00 | 0.00 | 0.00 | 0.00 | 0.00 | 0.00 |
| 1271 | 0.0 | 0.00 | 0.00 | 0.54 | 0.00 | 0.00 | 0.00 | 0.00 | 0.64 | 0.00 |
| 1272 | 0.0 | 0.00 | 0.00 | 0.00 | 0.00 | 0.00 | 0.00 | 0.00 | 0.38 | 0.00 |
| 1273 | 0.0 | 0.00 | 0.00 | 0.00 | 0.00 | 0.00 | 0.00 | 0.00 | 0.38 | 0.00 |
| 1274 | 0.0 | 0.90 | 0.00 | 0.00 | 0.00 | 0.00 | 0.00 | 0.00 | 0.38 | 0.00 |
| 1275 | 0.0 | 0.00 | 0.00 | 0.00 | 0.00 | 0.00 | 0.00 | 0.00 | 0.47 | 0.00 |

### Step 3:

Multiply the *C* matrix by the normalized gene weight table (*W*) to obtain the scores for the list of eligible species. The entry with the top score is selected as identification of the MALDI spectra:

| entry      | genus           | species              | score           |
|------------|-----------------|----------------------|-----------------|
| <b>39</b>  | <b>bacillus</b> | <b>anthracis</b>     | <b>2.462446</b> |
| <b>110</b> | <b>bacillus</b> | <b>thuringiensis</b> | <b>2.462446</b> |
| <b>111</b> | <b>bacillus</b> | <b>toyonensis</b>    | <b>2.462446</b> |
| <b>77</b>  | <b>bacillus</b> | <b>manliponensis</b> | <b>2.462446</b> |
| <b>63</b>  | <b>bacillus</b> | <b>gaemokensis</b>   | <b>2.462446</b> |
| <b>56</b>  | <b>bacillus</b> | <b>cytotoxicus</b>   | <b>2.462446</b> |
| 45         | bacillus        | bombysepticus        | 1.816004        |
| 82         | bacillus        | mycoides             | 1.503078        |
| 93         | bacillus        | pseudomycoides       | 1.503078        |
| 118        | bacillus        | weihenstephanensis   | 1.503078        |
| 50         | bacillus        | cereus               | 1.503078        |
| 37         | bacillus        | aminovorans          | 1.119903        |
| 1264       | yersinia        | intermedia           | 0.966819        |
| 1263       | yersinia        | frederiksenii        | 0.966819        |
| 1261       | yersinia        | enterocolitica       | 0.966819        |
| 639        | lactococcus     | piscium              | 0.959368        |
| 672        | legionella      | sainthelensi         | 0.909401        |
| 55         | bacillus        | coahuilensis         | 0.856637        |
| 57         | bacillus        | decisifrondis        | 0.856637        |
| 43         | bacillus        | badius               | 0.856637        |
| 44         | bacillus        | bataviensis          | 0.856637        |
| 52         | bacillus        | circulans            | 0.856637        |

|      |               |                   |          |
|------|---------------|-------------------|----------|
| 58   | bacillus      | encimensis        | 0.856637 |
| 61   | bacillus      | firmus            | 0.856637 |
| 71   | bacillus      | infantis          | 0.856637 |
| 81   | bacillus      | methanolicus      | 0.856637 |
| 116  | bacillus      | vireti            | 0.856637 |
| 84   | bacillus      | nealsonii         | 0.856637 |
| 85   | bacillus      | niacini           | 0.856637 |
| 87   | bacillus      | oceanisediminis   | 0.856637 |
| ...  | ...           | ...               | ...      |
| 502  | lactobacillus | composti          | 0.000000 |
| 503  | lactobacillus | concausus         | 0.000000 |
| 504  | lactobacillus | coryniformis      | 0.000000 |
| 506  | lactobacillus | crustorum         | 0.000000 |
| 507  | lactobacillus | curieae           | 0.000000 |
| 508  | lactobacillus | curvatus          | 0.000000 |
| 510  | lactobacillus | dextrinicus       | 0.000000 |
| 511  | lactobacillus | diolivorans       | 0.000000 |
| 512  | lactobacillus | equi              | 0.000000 |
| 514  | lactobacillus | equigenerosi      | 0.000000 |
| 515  | lactobacillus | fabifermentans    | 0.000000 |
| 516  | lactobacillus | farciminis        | 0.000000 |
| 517  | lactobacillus | farraginis        | 0.000000 |
| 521  | lactobacillus | fructivorans      | 0.000000 |
| 537  | lactobacillus | helsingborgensis  | 0.000000 |
| 522  | lactobacillus | frumenti          | 0.000000 |
| 523  | lactobacillus | fuchuensis        | 0.000000 |
| 524  | lactobacillus | futsaii           | 0.000000 |
| 525  | lactobacillus | gallinarum        | 0.000000 |
| 526  | lactobacillus | gasseri           | 0.000000 |
| 527  | lactobacillus | gastricus         | 0.000000 |
| 529  | lactobacillus | gigeriorum        | 0.000000 |
| 530  | lactobacillus | ginsenosidimutans | 0.000000 |
| 531  | lactobacillus | graminis          | 0.000000 |
| 532  | lactobacillus | hammesii          | 0.000000 |
| 533  | lactobacillus | hamsteri          | 0.000000 |
| 534  | lactobacillus | harbinensis       | 0.000000 |
| 535  | lactobacillus | hayakitensis      | 0.000000 |
| 536  | lactobacillus | heilongjiangensis | 0.000000 |
| 1275 | yersinia      | wautersii         | 0.000000 |

The result of identification at genus level is *Bacillus*. At species level, it can not be distinguished between *Bacillus cytotoxicus*, *Bacillus gaemokensis*, *Bacillus manliponensis*, *Bacillus toyonensis*, *Bacillus thuringiensis*, and *Bacillus anthracis*. The original label of the MALDI spectra was *Bacillus anthracis*, which species is listed in the group.



## S5: Chance of random matches (Figure S2)

403 MALDI-TOF spectra corresponding to 14 genera and protein sequences of the genera in UniProt were used to test the effect of random peak matching. The averaged numbers of matched peaks were calculated for mass spectra from each individual genus (y-axis in **Figure S2**) when using the protein sequences of a specific genus (x-axis in **Figure S2**) for peak labelling. As shown on **Figure S2**, the chance for random matches is minimal. Much more peaks in MALDI-TOF spectra can be labeled when using the protein sequences of the corresponding genus than using protein sequences from any other genera.

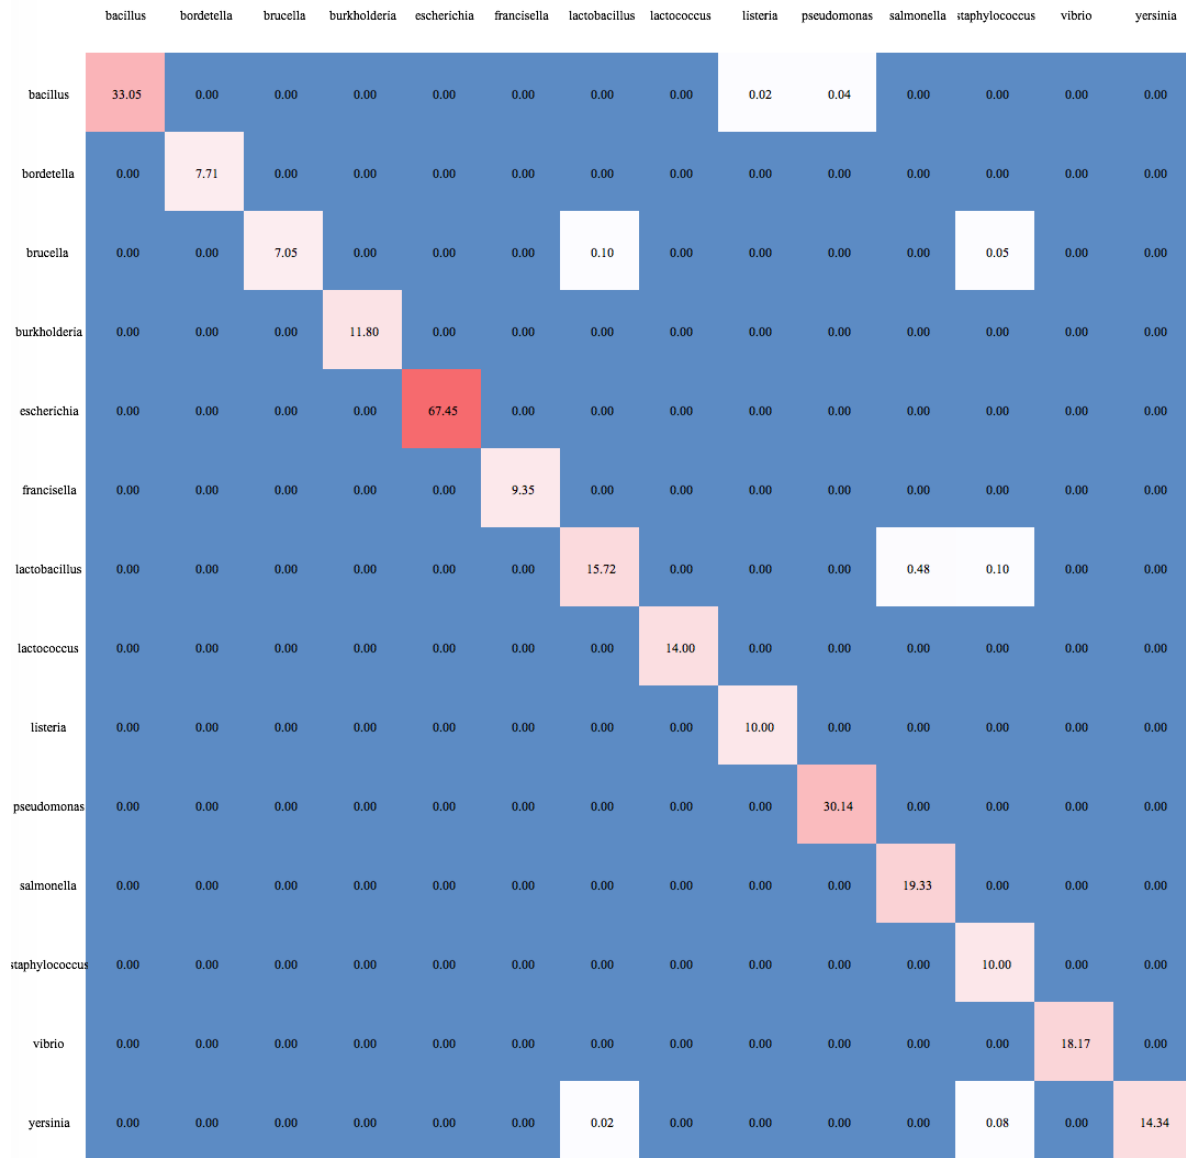

**Figure S2.** Values in the cell show the averaged numbers of matched peaks for mass spectra from each individual genus (y-axis) when using the protein sequences of a specific genus (x-axis) for peak labelling.

**S6: Bacterial identification by considering only ribosomal proteins (Figure S3)**

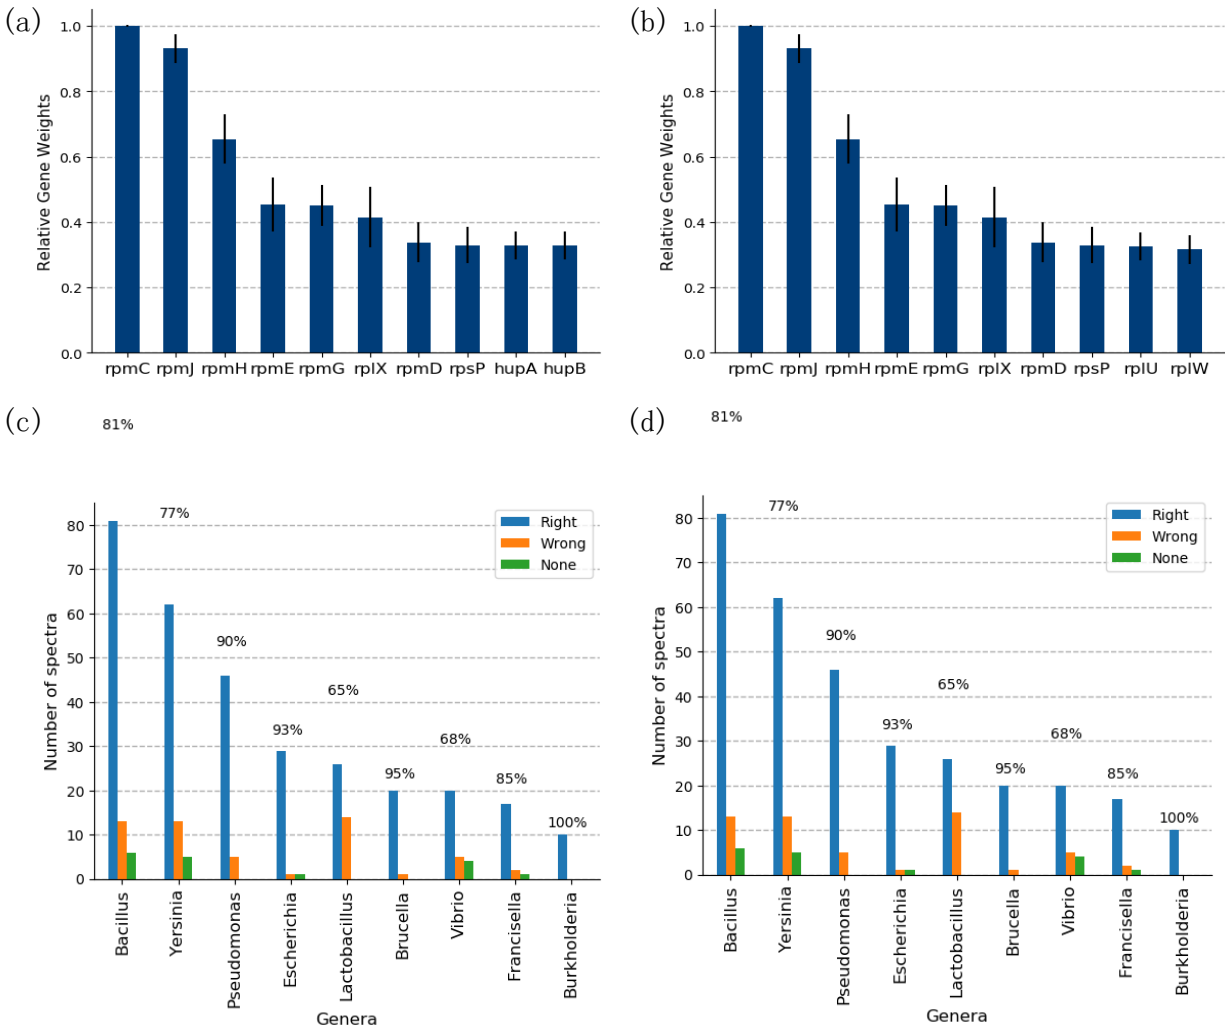

**Figure S3.** (a) The 10 most informative genes obtained with the double cross-validation procedure using all the protein sequences in a genus; (b) The 10 most informative genes obtained with the double cross-validation procedure using only ribosomal protein sequences in a genus; (c) Identification accuracy for mass spectra from different genera using the 10 most informative genes from (a); (d) Identification accuracy for mass spectra from different genera using the 10 most informative genes from (b).

**S7: Variation in molecular weights of the proteins encoded by the most informative genes (Figure S4a and b)**

Variation in molecular weights of the proteins encoded by the following 9 genes in different genera (the results for gene rpmC is shown in **Figure 5** in the manuscript):

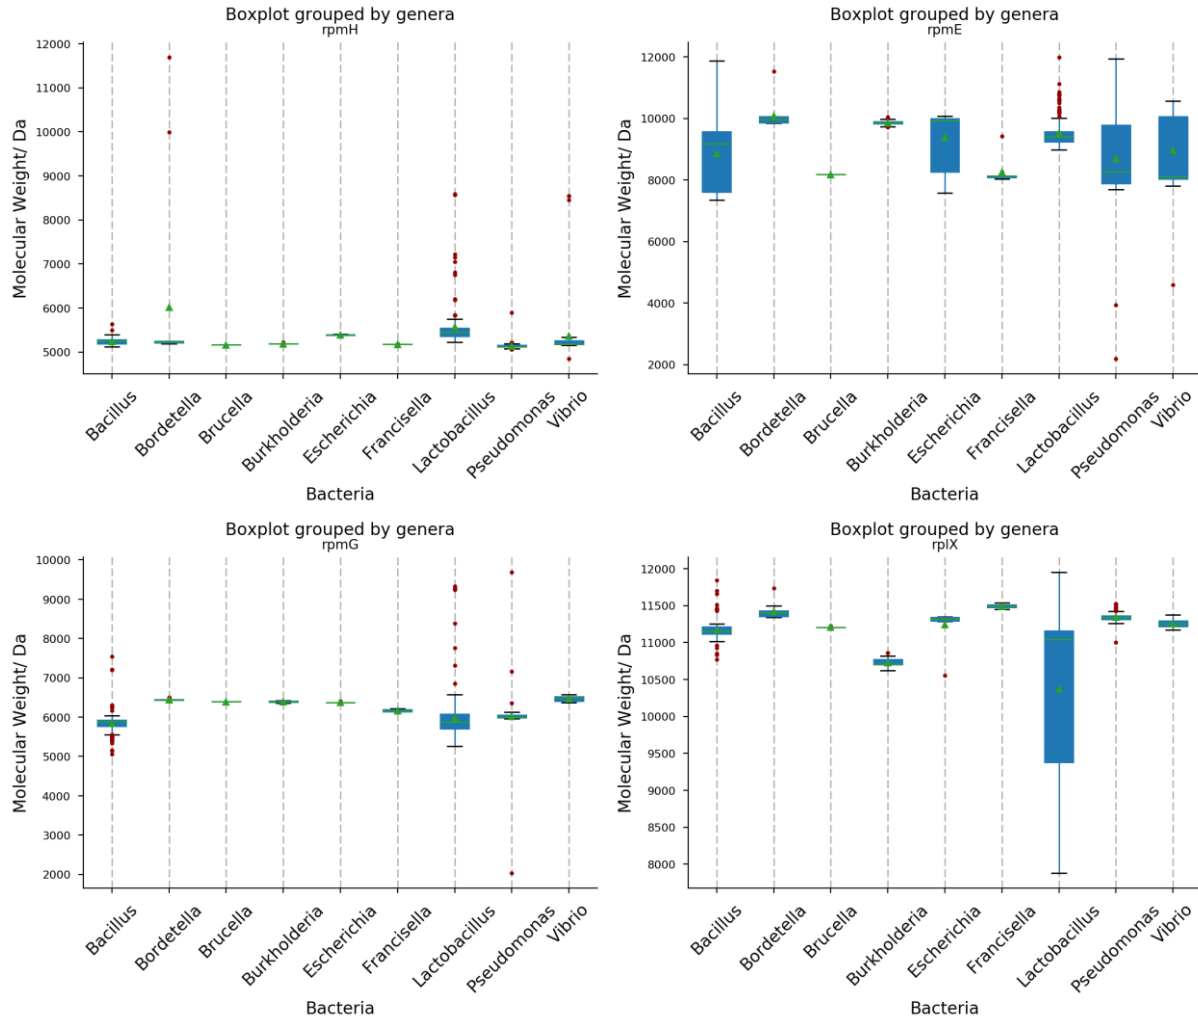

**Figure S4a.** Variation of the molecular weights of the proteins encoded by rpmH, rpmE, rpmG, rplX in different genera using the protein sequences database from UniProt. Red dots shows outliers, the green triangle indicates mean value, the green line shows the median value and the blue box shows data values between inter quartile range (25%-75%).

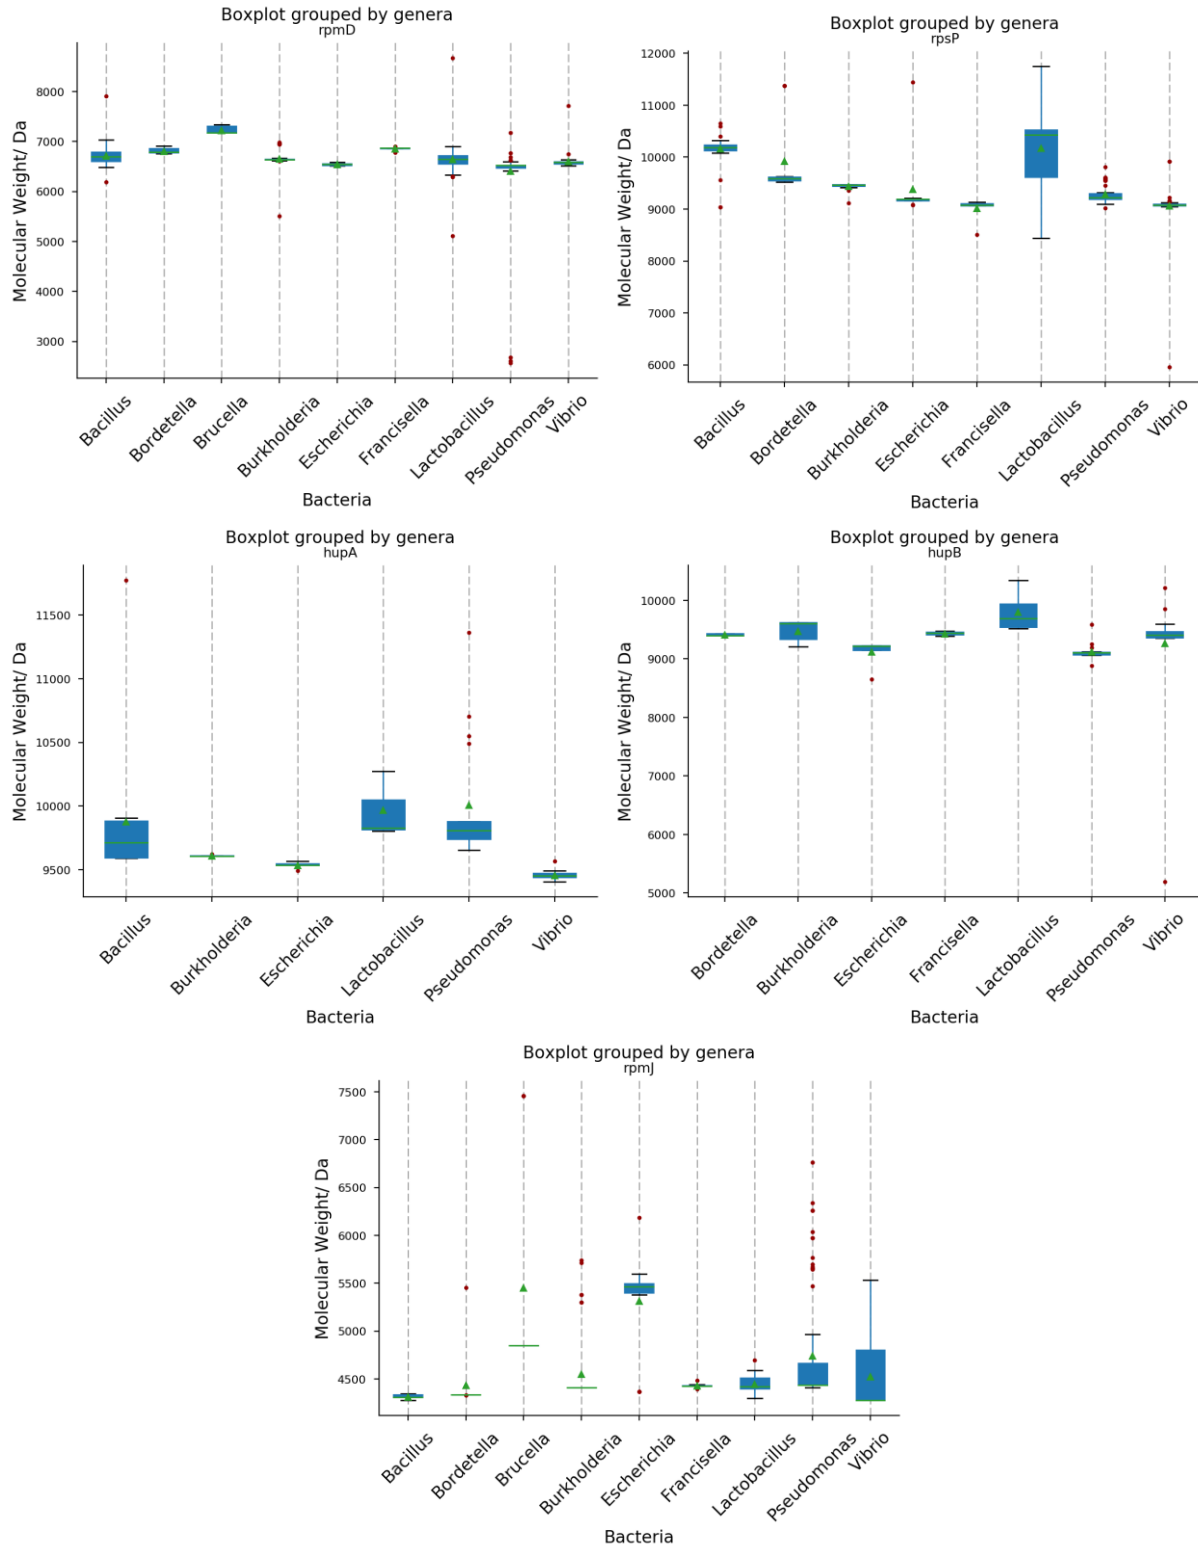

**Figure S4b.** Variation of the molecular weights of the proteins encoded by rpmD, rpsP, hupA, hupB, rpmJ in different genera using the protein sequences database from UniProt. Red dots shows outliers, the green triangle indicates mean value, the green line shows the median value and the blue box shows data values between inter quartile range (25%-75%).
